# Supplementary material for: Highly thermal conductive resins formed from wide-temperature-range eutectic mixtures of liquid crystalline epoxies bearing diglycidyl moieties at the side positions
Source: Royal Society of Chemistry journal article supplement (doi:10.1039/c7py00243b), 2017-01-01
Supplement: c7py00243b1.pdf [file c7py00243b1.pdf]

## Supporting Information

# Highly Thermal Conductive Resins formed from Wide-Temperature-Range Eutectic Mixtures of Liquid Crystalline Epoxies Bearing Diglycidyl Moieties at the Side Positions

Youngsu Kim,<sup>a,c,‡</sup> Hyeonuk Yeo,<sup>a,‡</sup> Nam-Ho You,<sup>a</sup> Se Gyu Jang,<sup>a</sup> Seokhoon Ahn,<sup>a</sup> Kwang-Un Jeong,<sup>a</sup> Seung Hee Lee,<sup>a</sup> and Munju Goh<sup>\*,a</sup>

<sup>a</sup> *Institute of Advanced Composite Materials, Korea Institute of Science and Technology (KIST), Chudong-ro 92, Bongdong-eup, Wanju-gun, Jellabuk-do 55324, Republic of Korea*

<sup>b</sup> *BK21 Plus Haptic Polymer Composite Research Team & Department of Polymer Nano Science and Technology, Chonbuk National University, Jeonju 561-756, Republic of Korea*

<sup>c</sup> *Department of BIN Fusion Technology, Chonbuk National University, 561-756, Republic of Korea*

<sup>‡</sup>These authors contributed equally.

**EMAIL ADDRESS:** goh@kist.re.kr

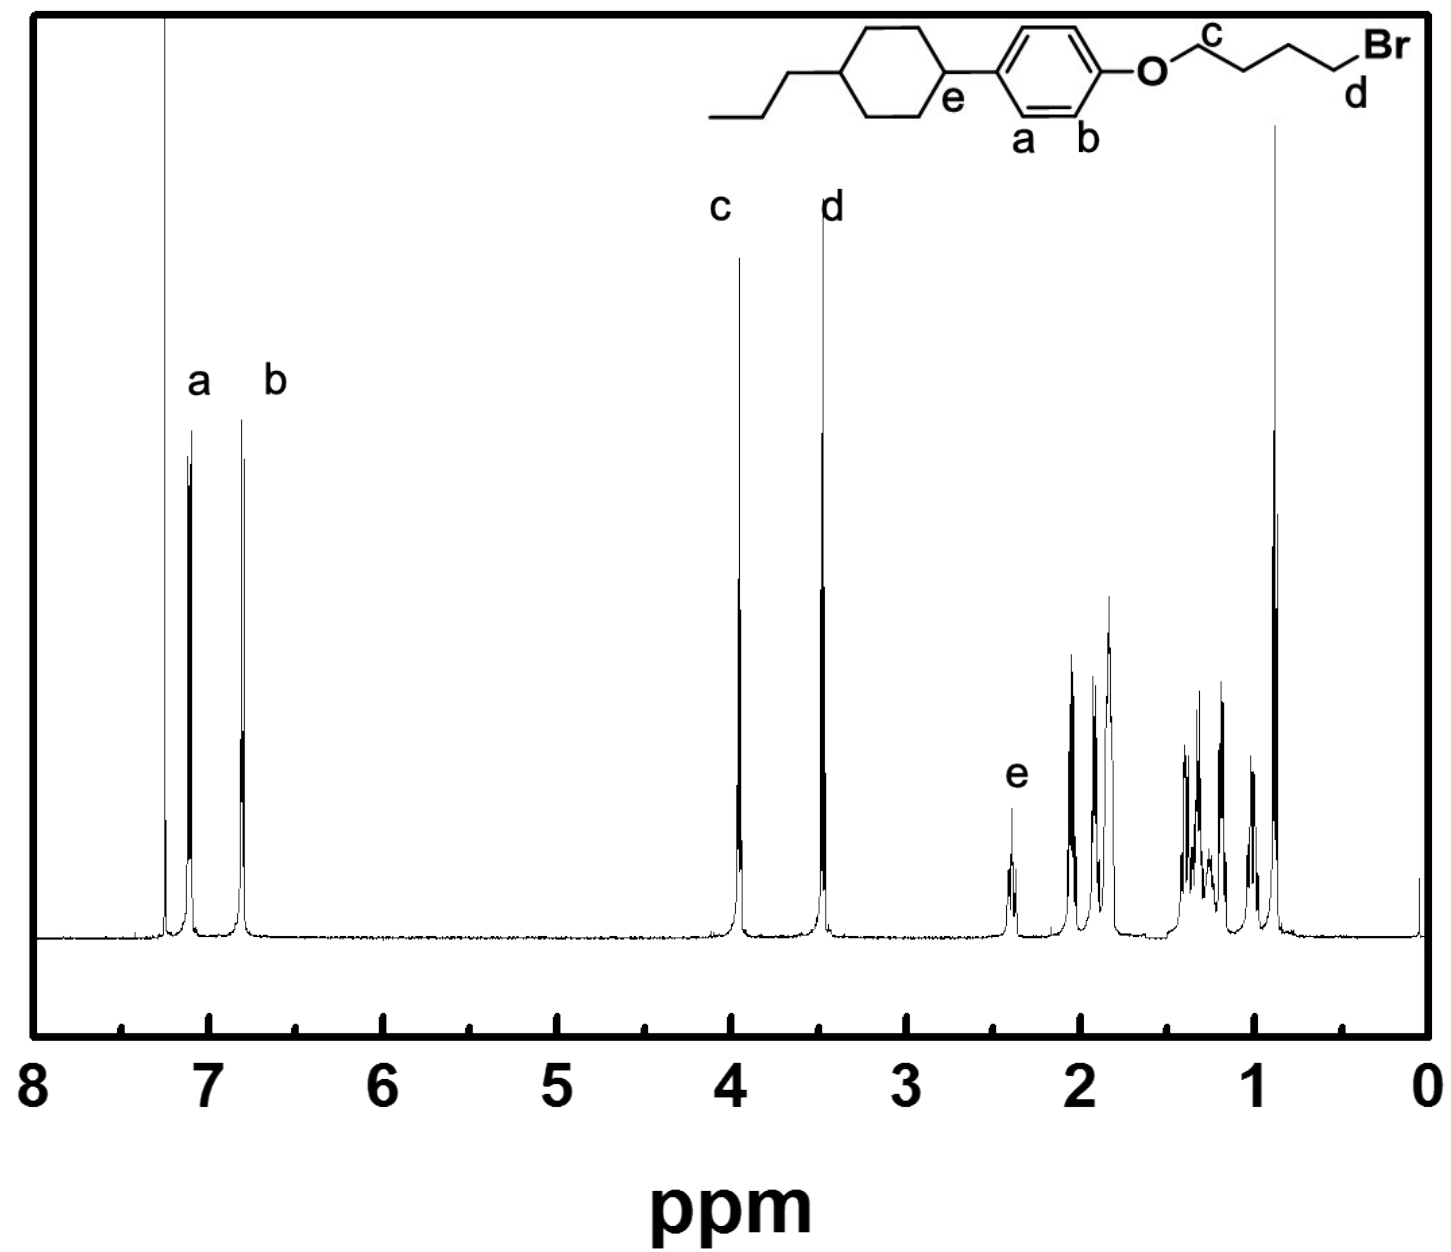

**Figure S1.** <sup>1</sup>H NMR spectra of PCH304Br

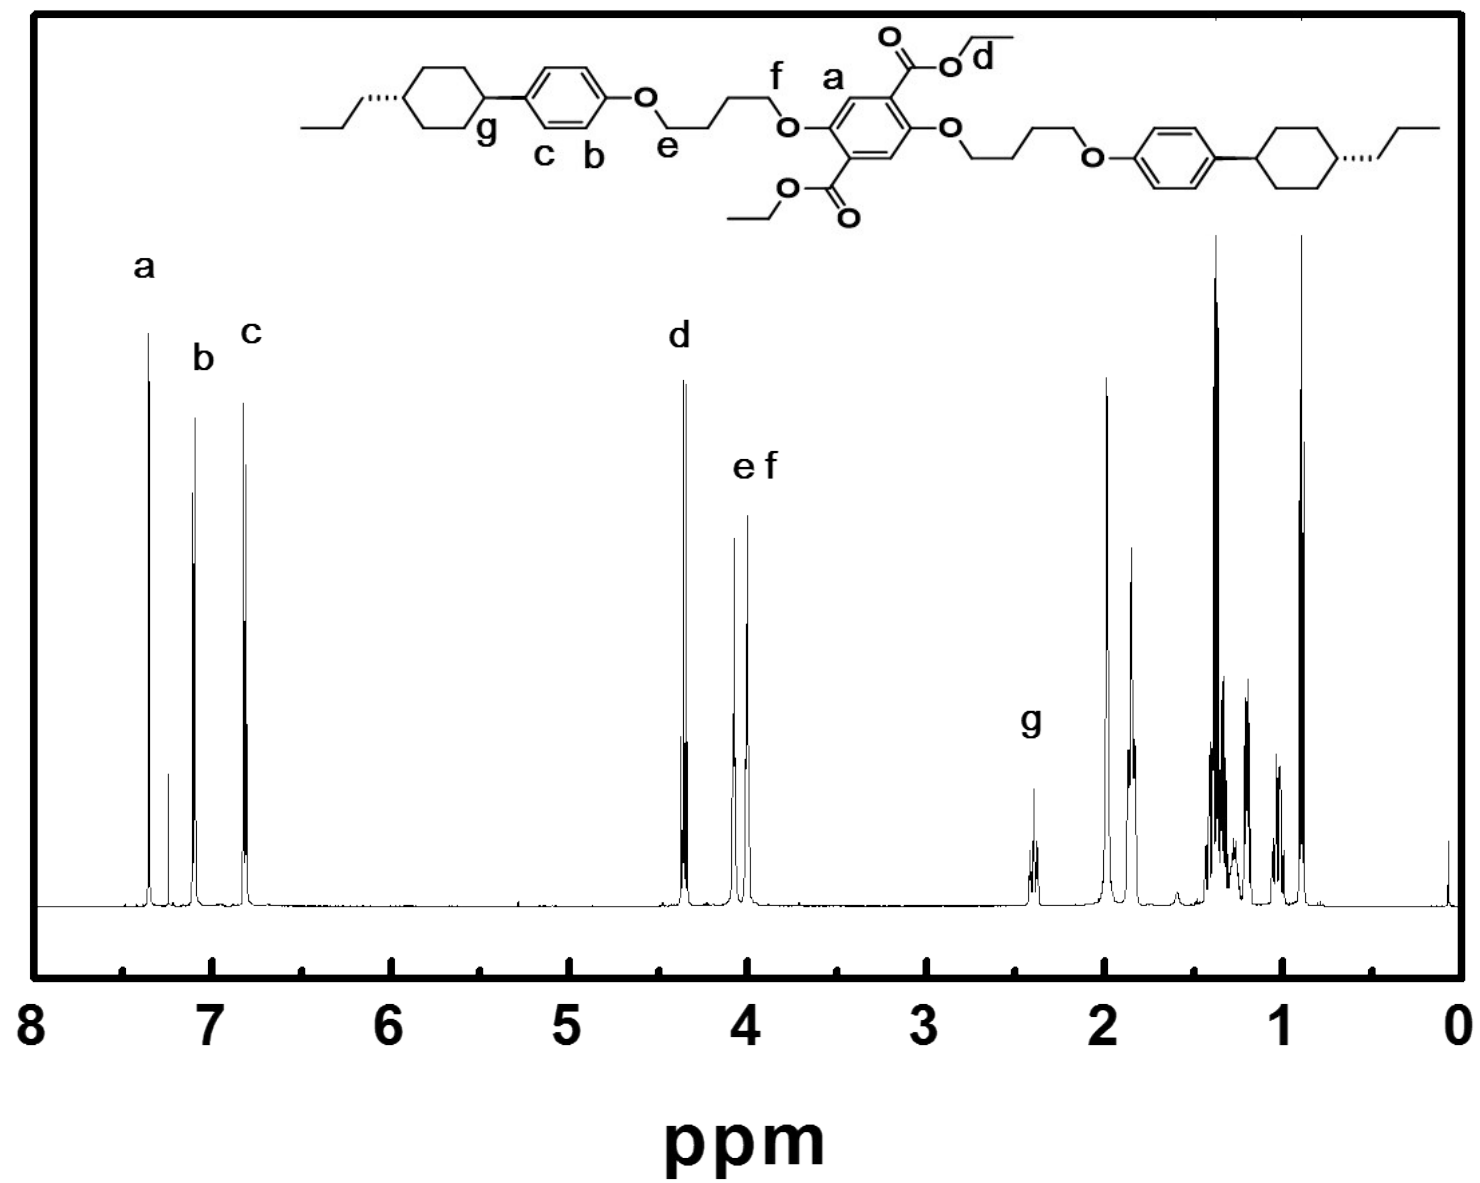

**Figure S2.** <sup>1</sup>H NMR spectra of DEP304

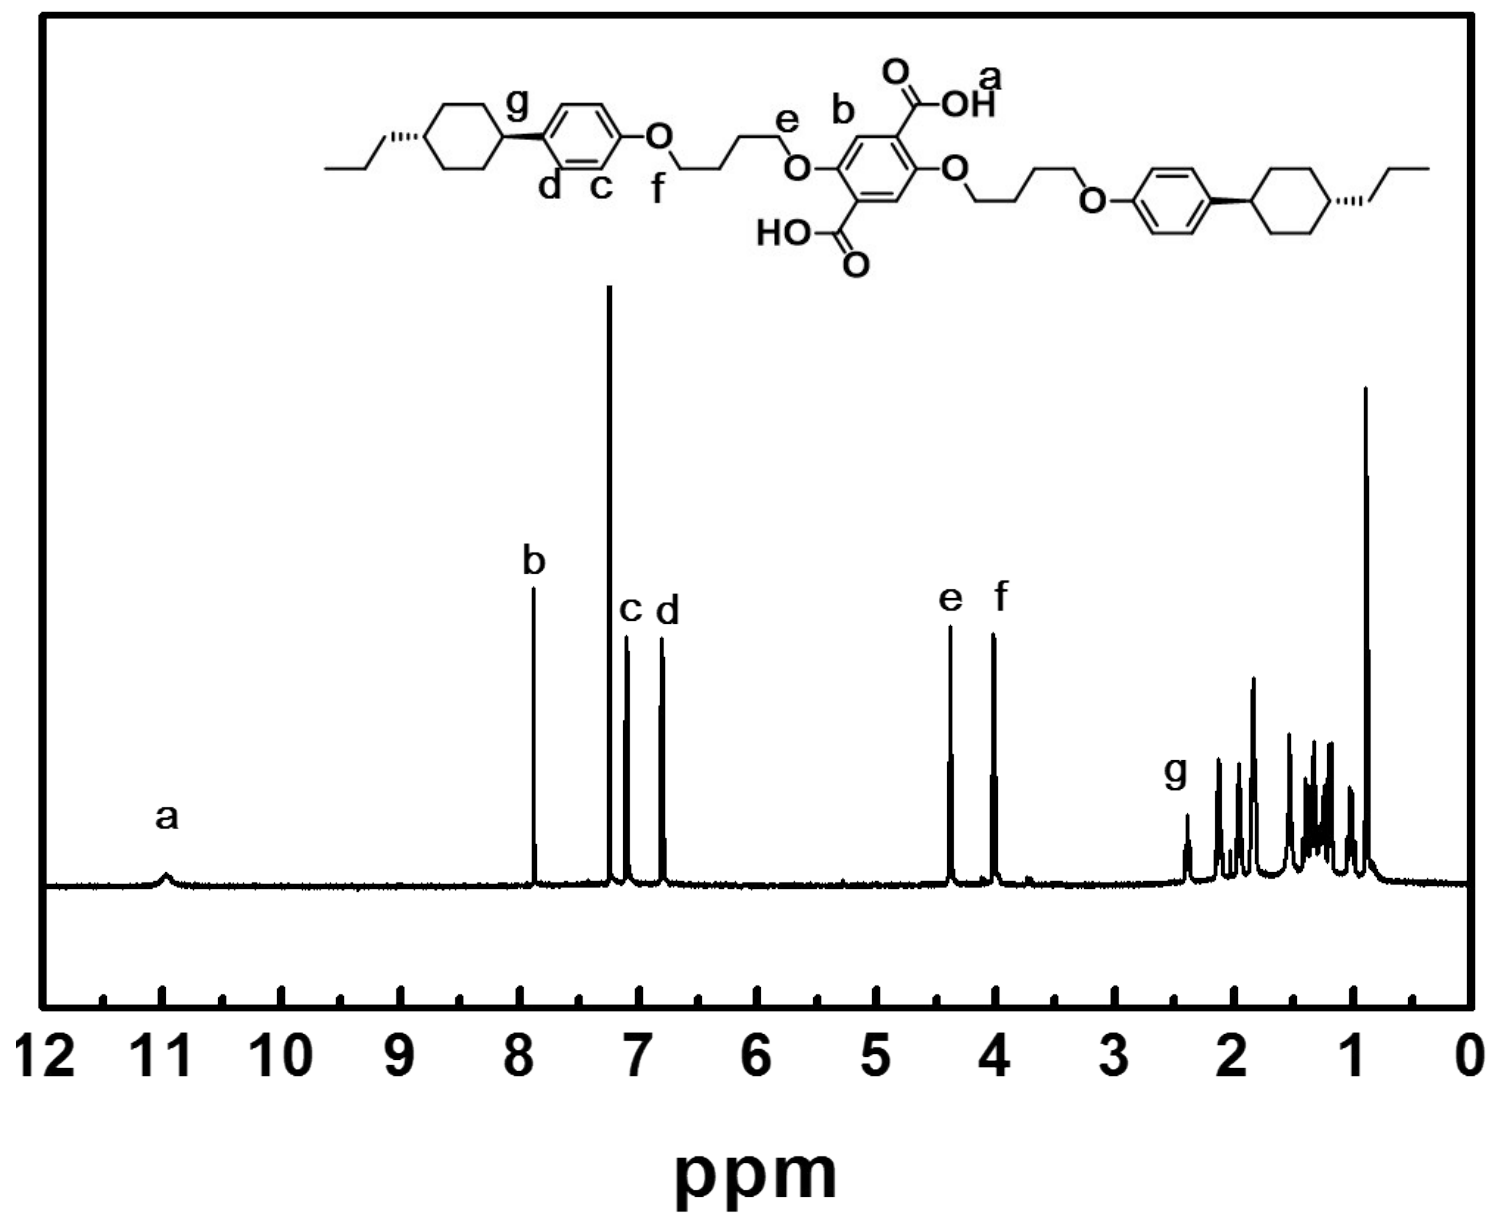

**Figure S3.** <sup>1</sup>H NMR spectra of DCP304

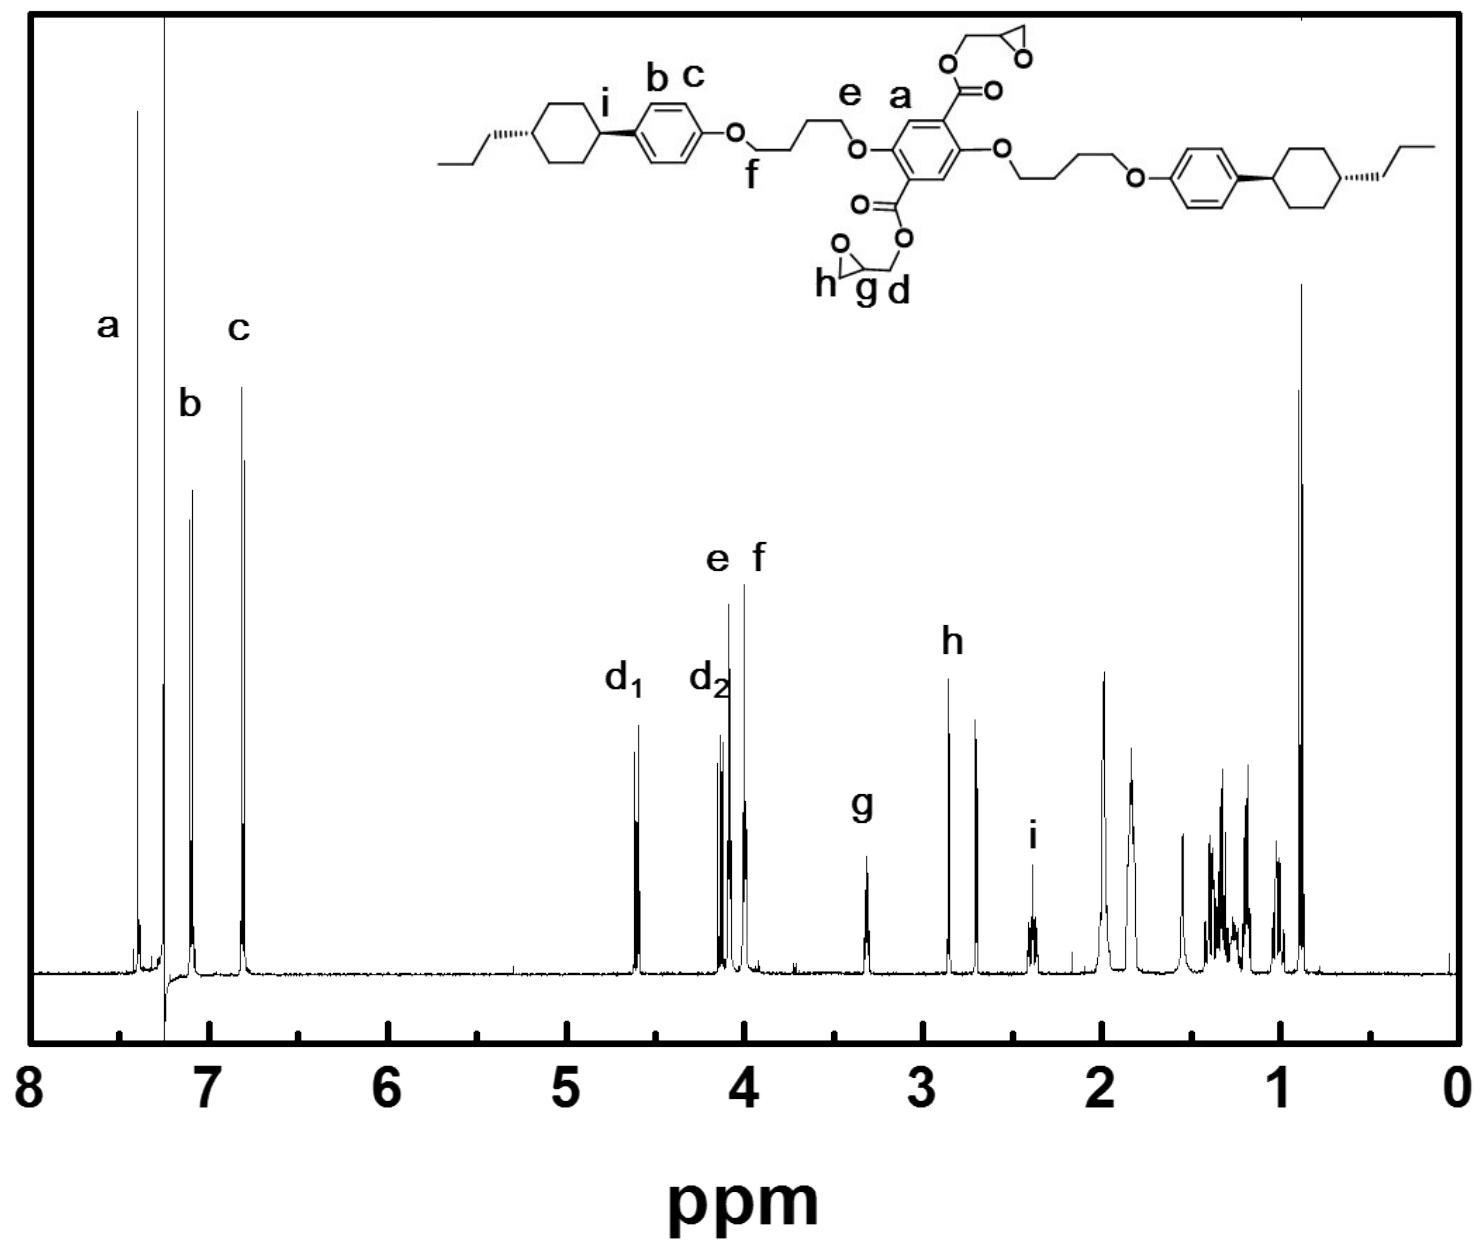

**Figure S4.** HNMR spectra of DGP304

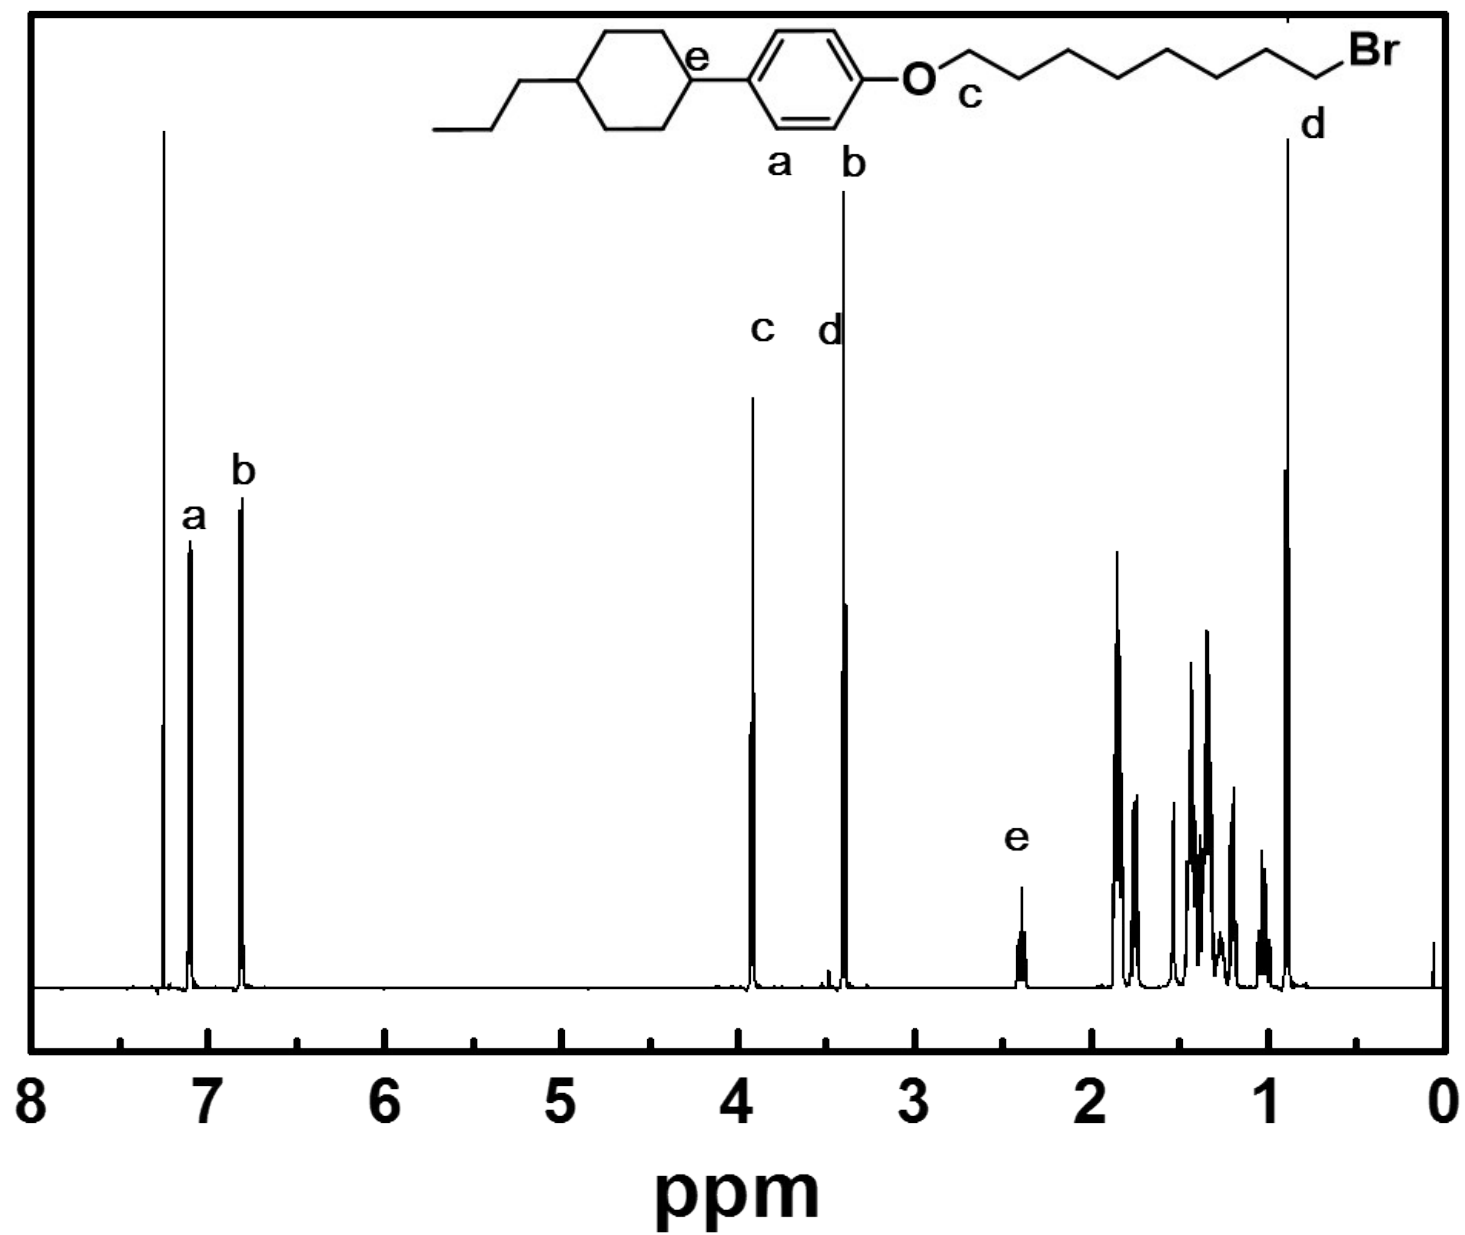

**Figure S5.** <sup>1</sup>H NMR spectra of PCH308Br

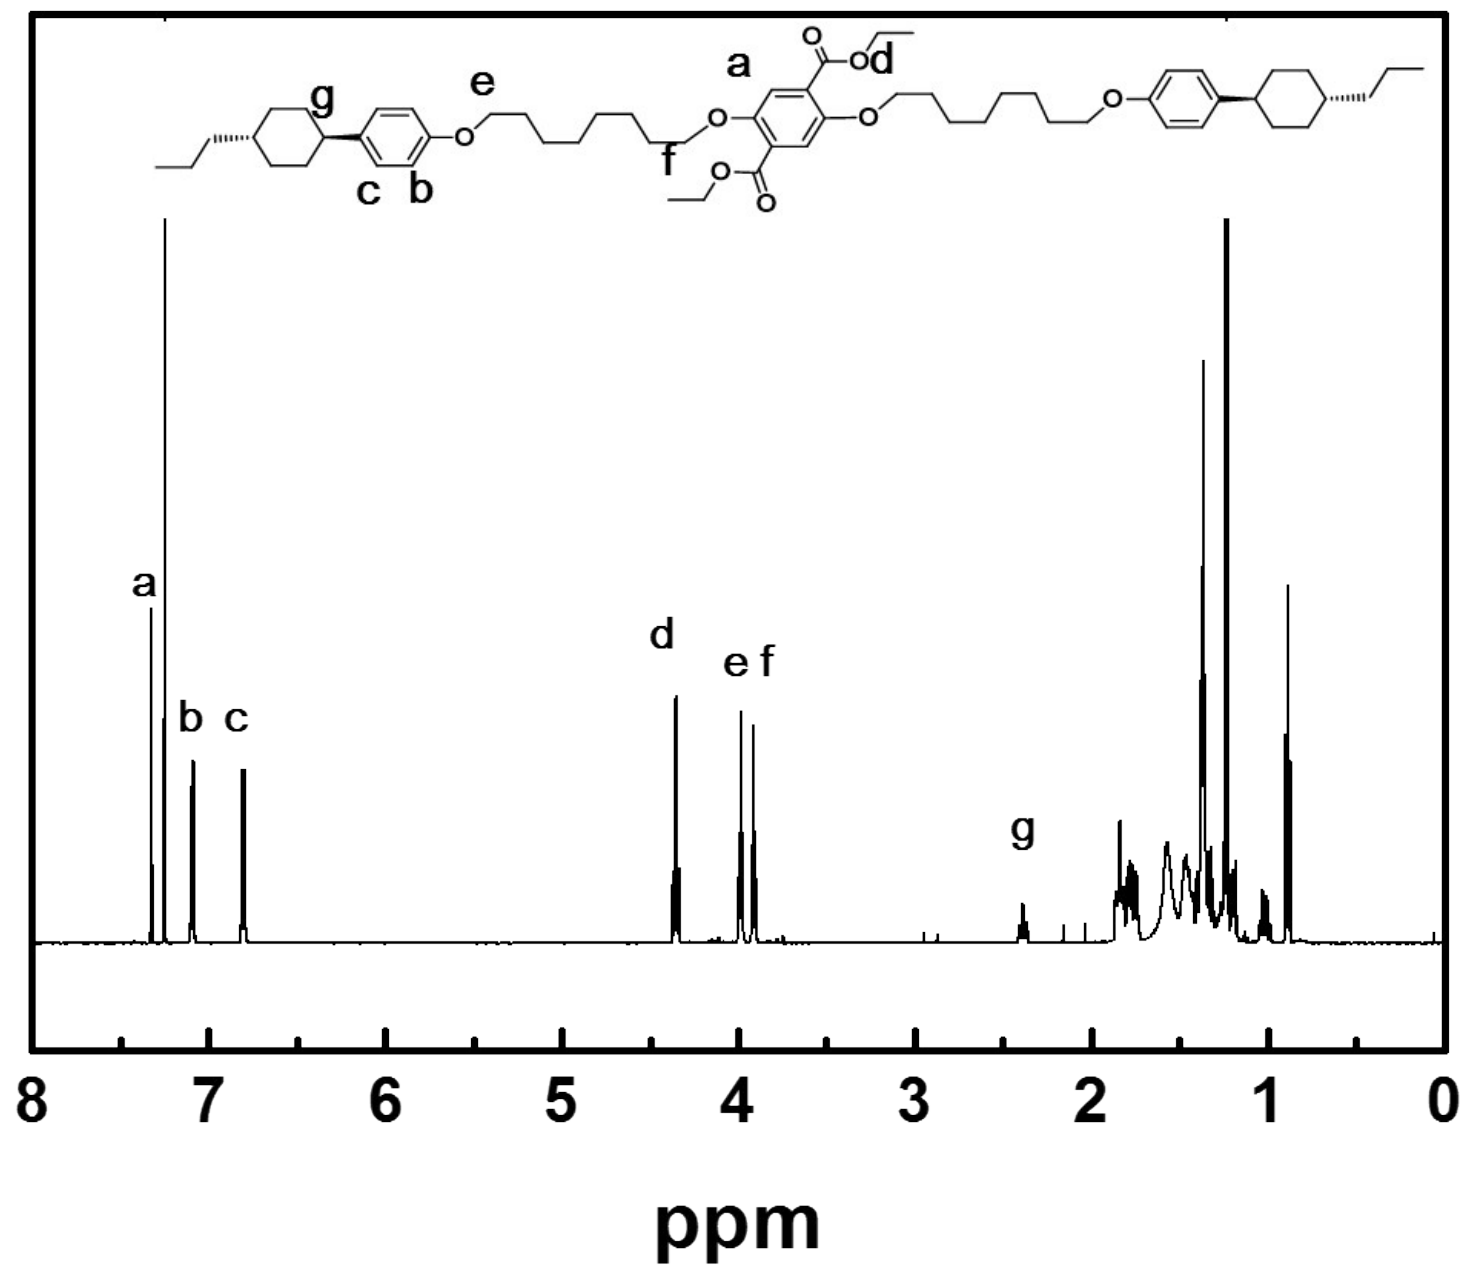

**Figure S5.** <sup>1</sup>H NMR spectra of DEP308

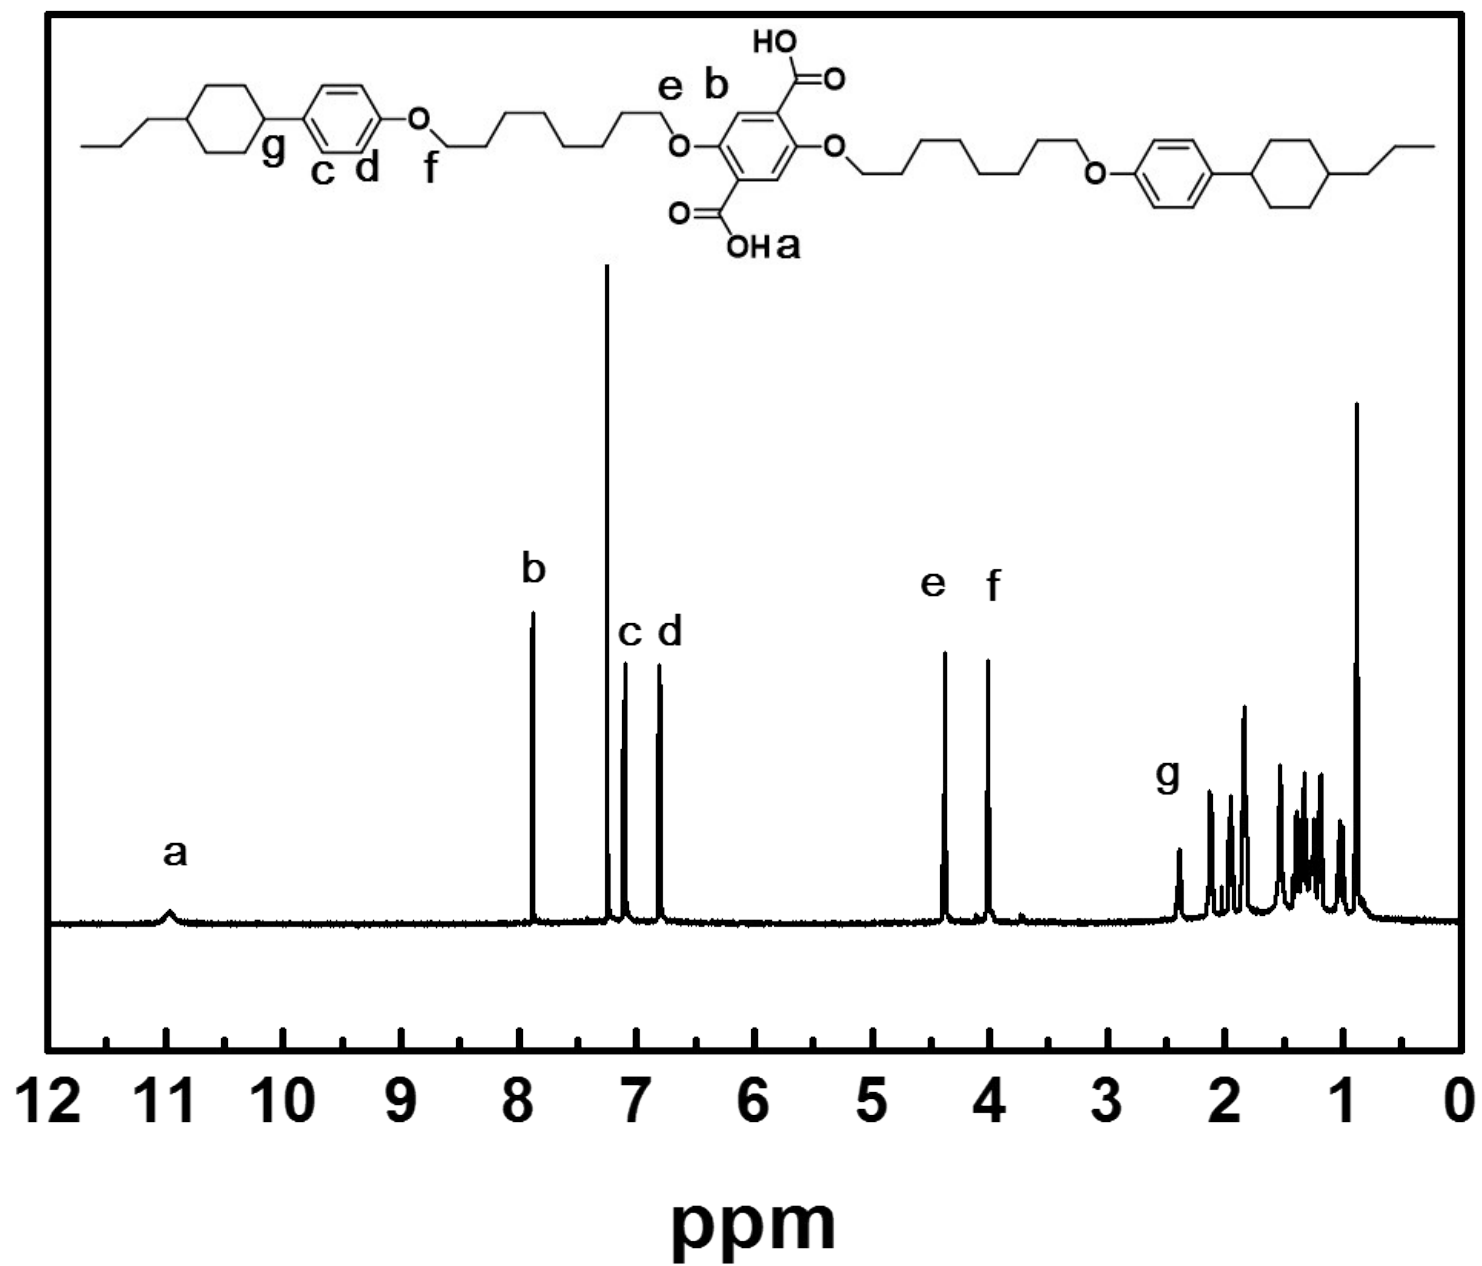

**Figure S6.** <sup>1</sup>H NMR spectra of DCP308



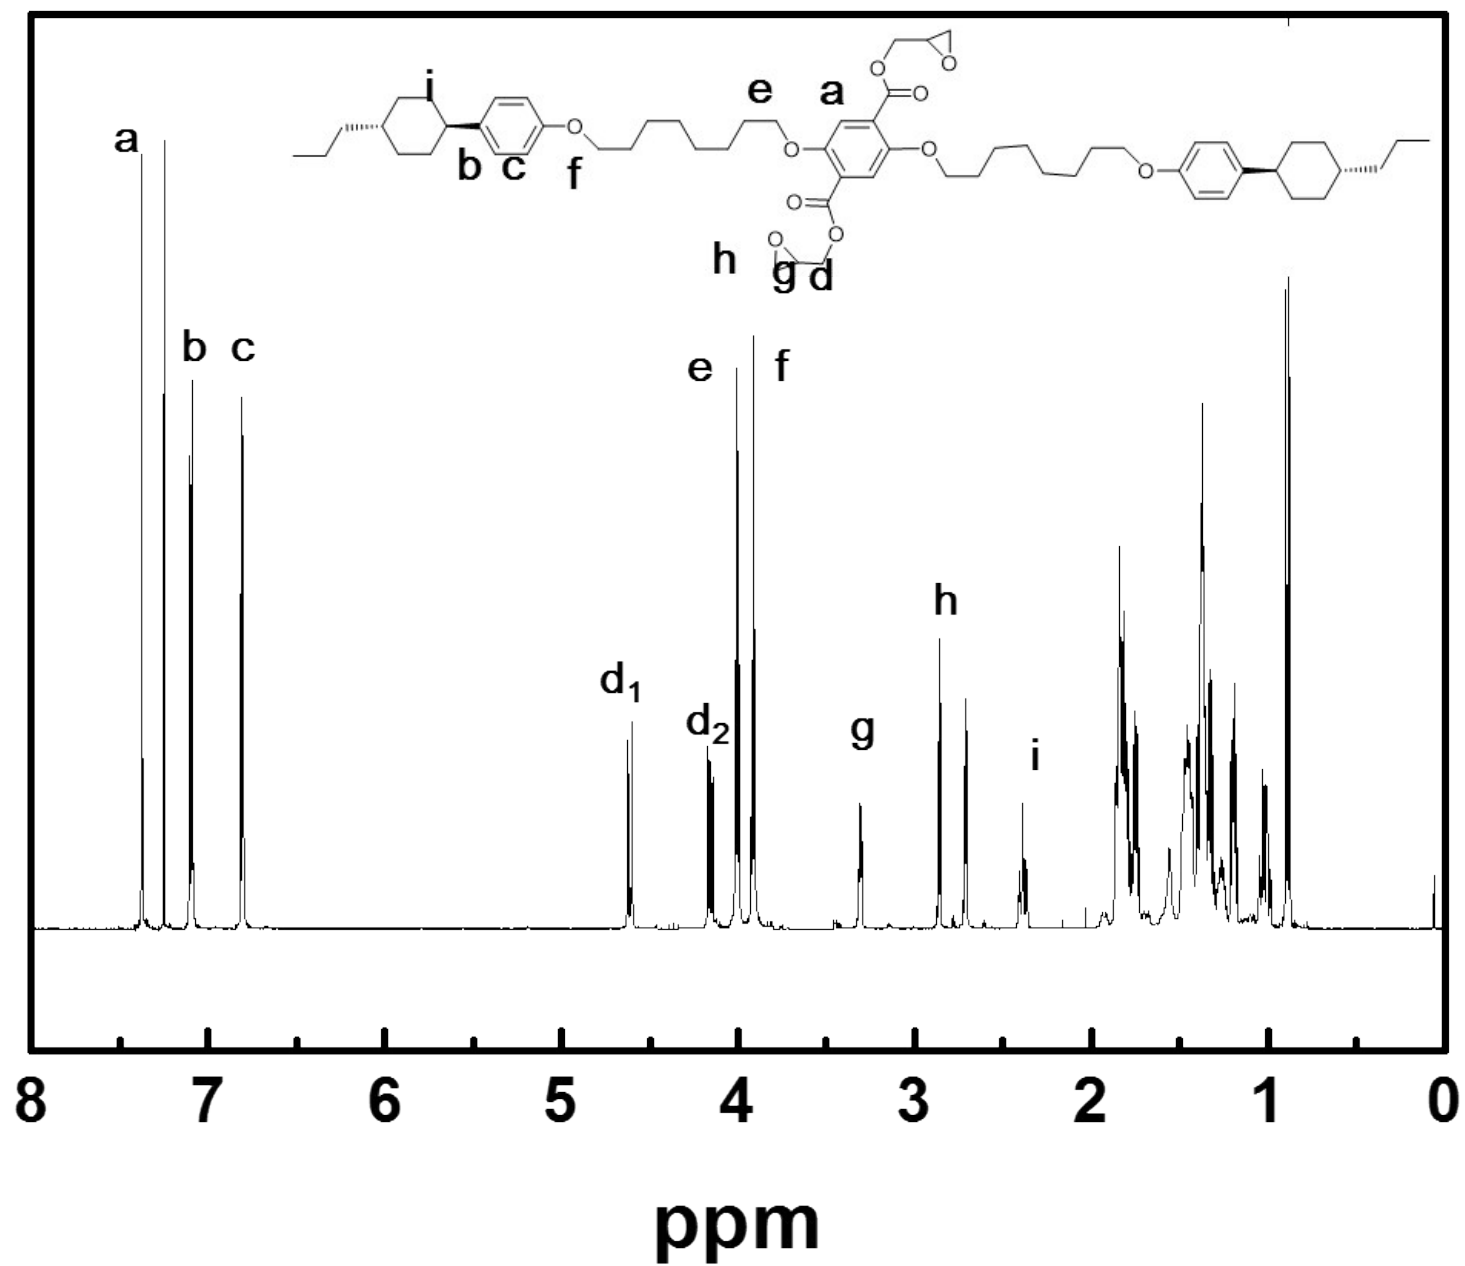

**Figure S7.** <sup>1</sup>H NMR spectra of DGP308

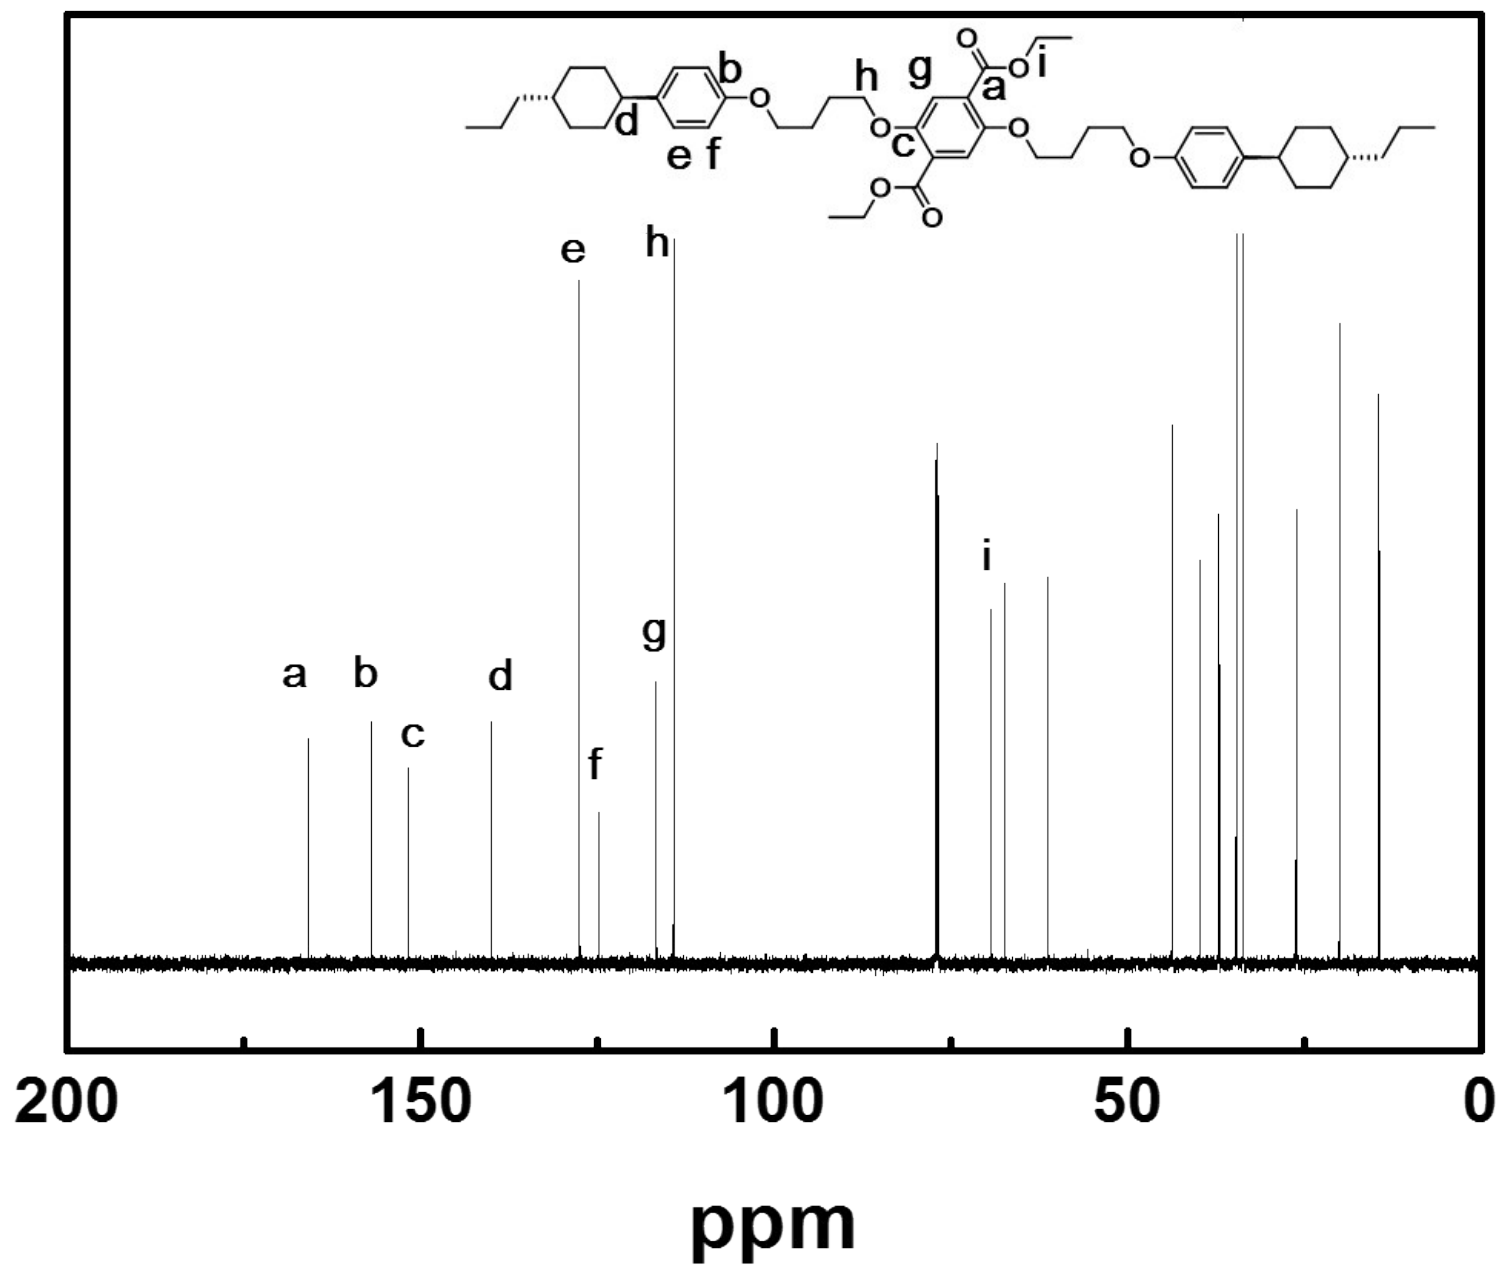

**Figure S8.** CNMR spectra of DEP308

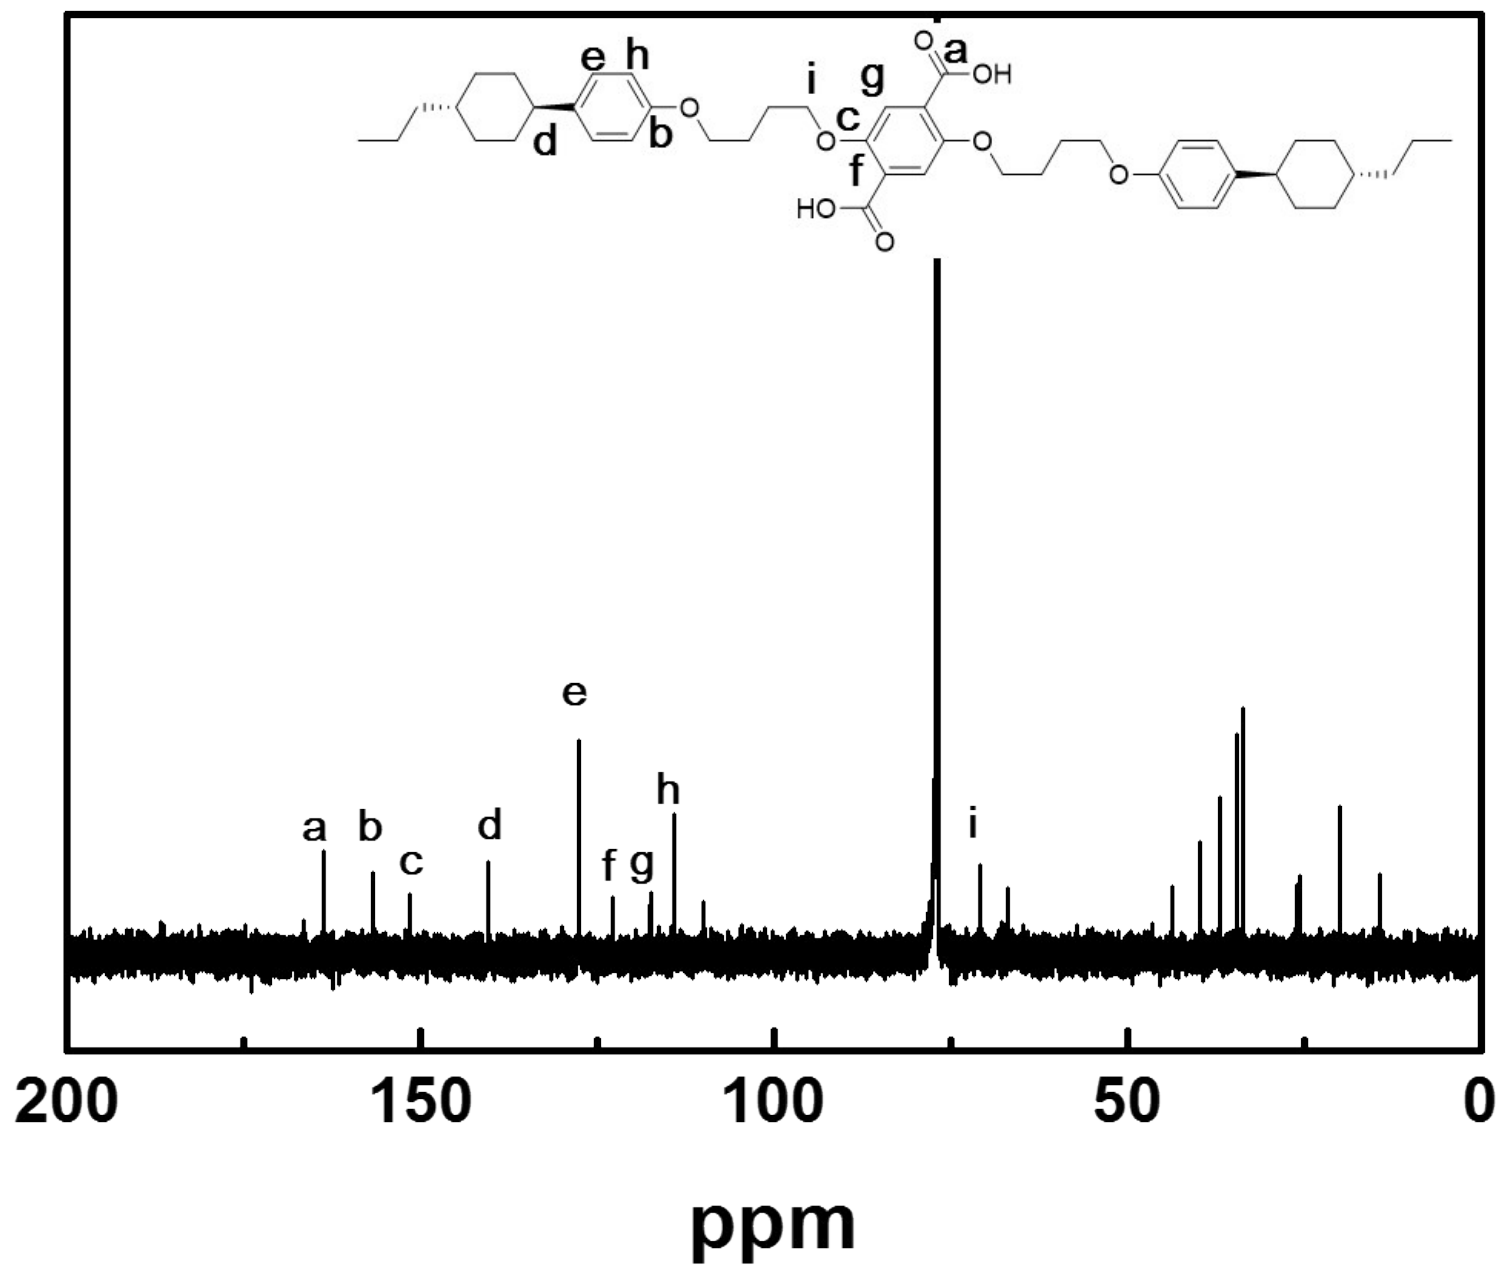

**Figure S9.** CNMR spectra of DCP308

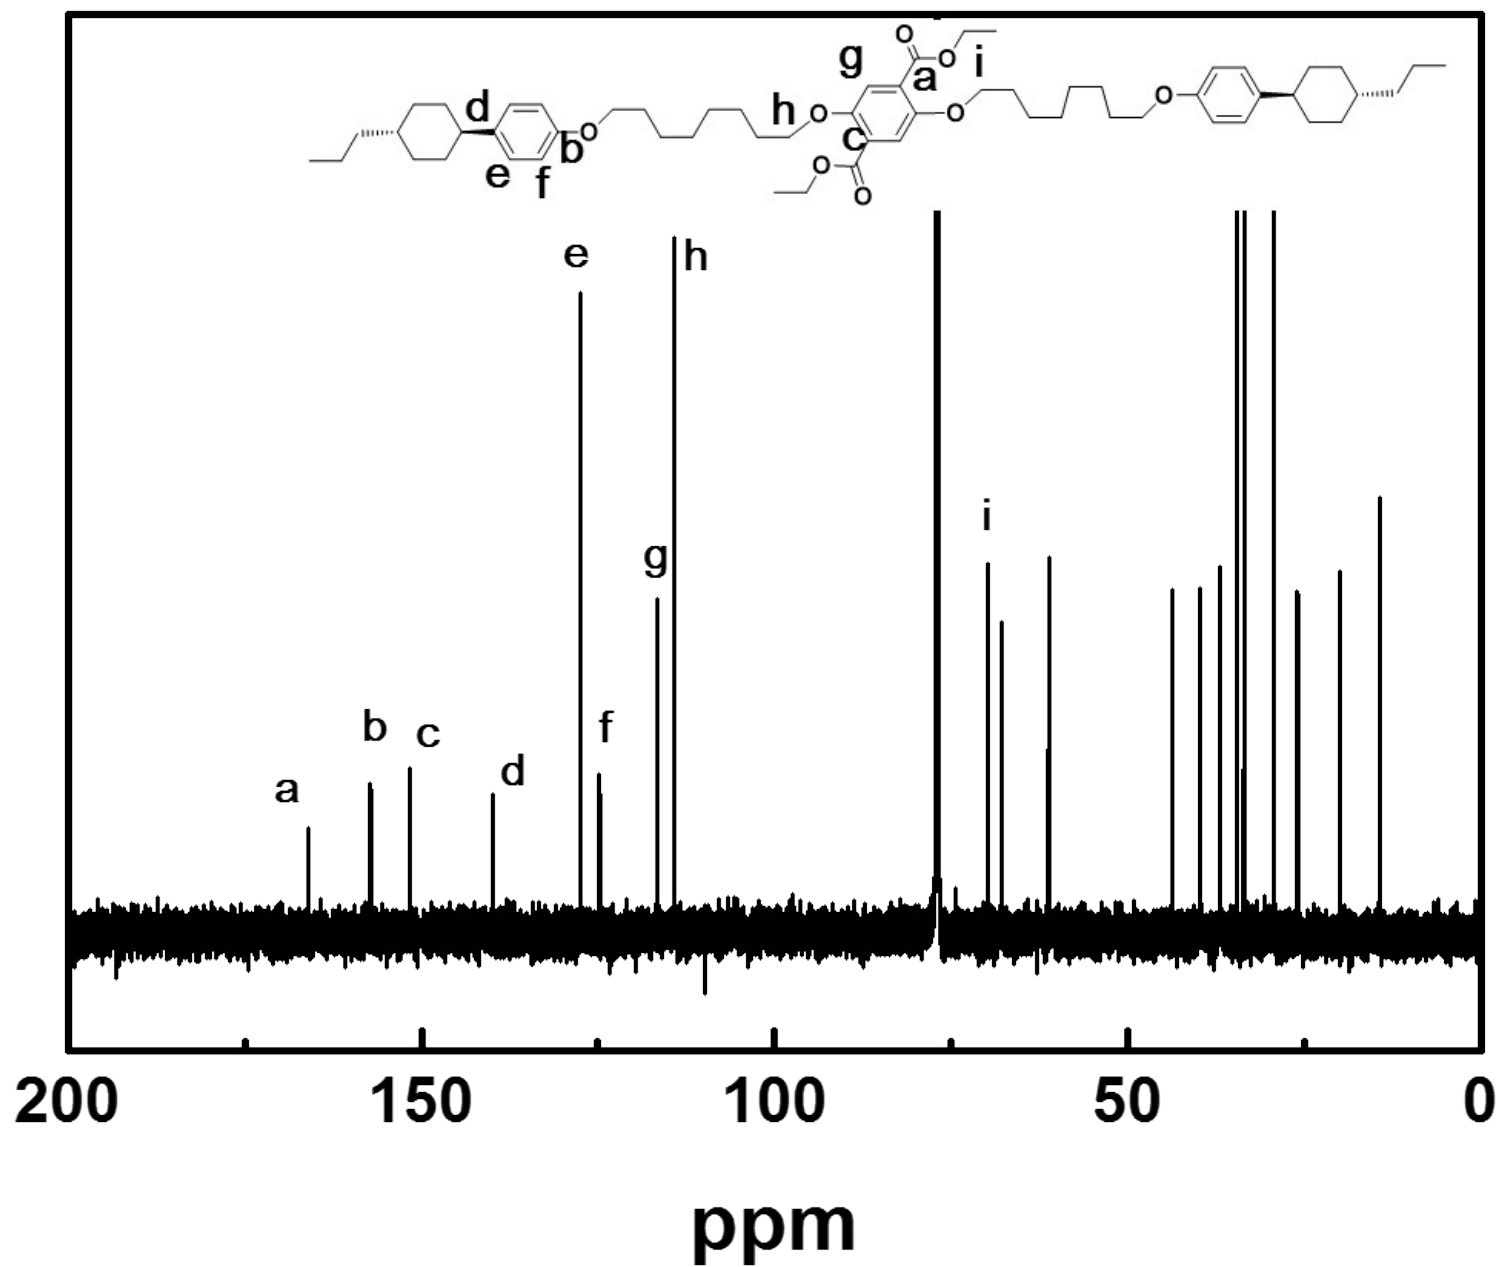

**Figure S10.** CNMR spectra of DEP308

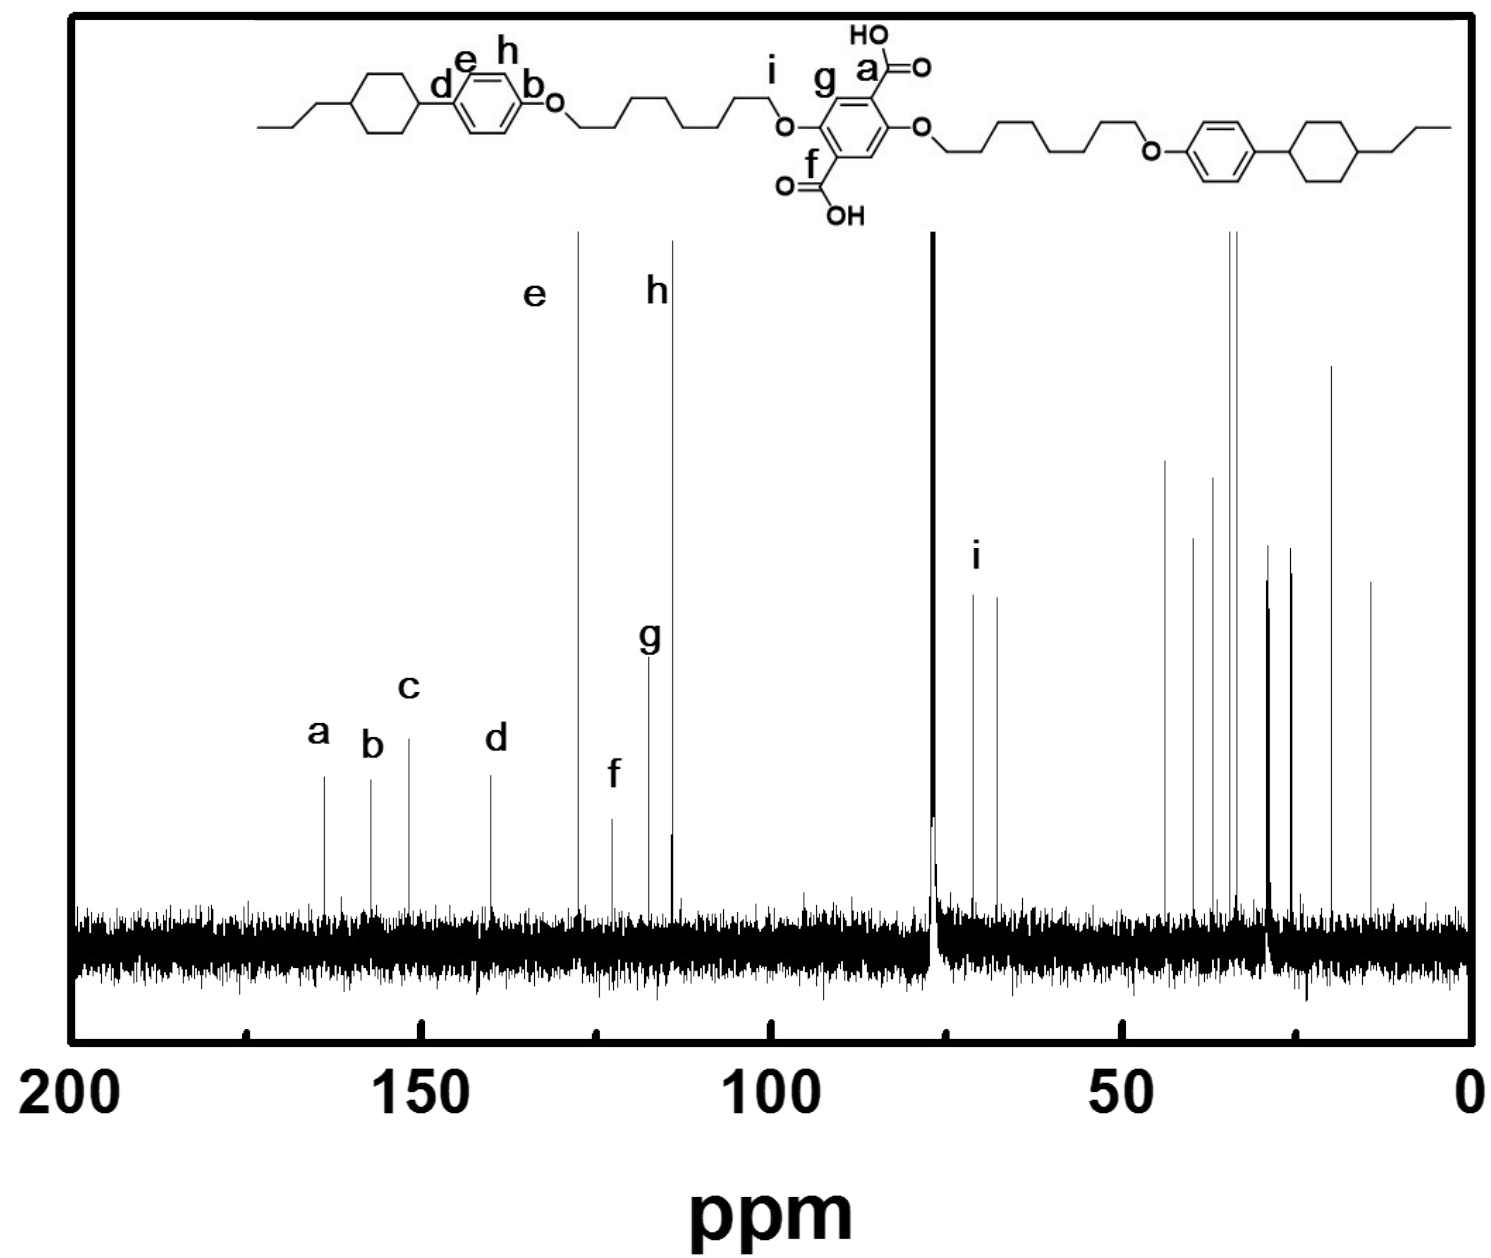

**Figure**

**S11.**

CNMR

spectra

of

DCP308

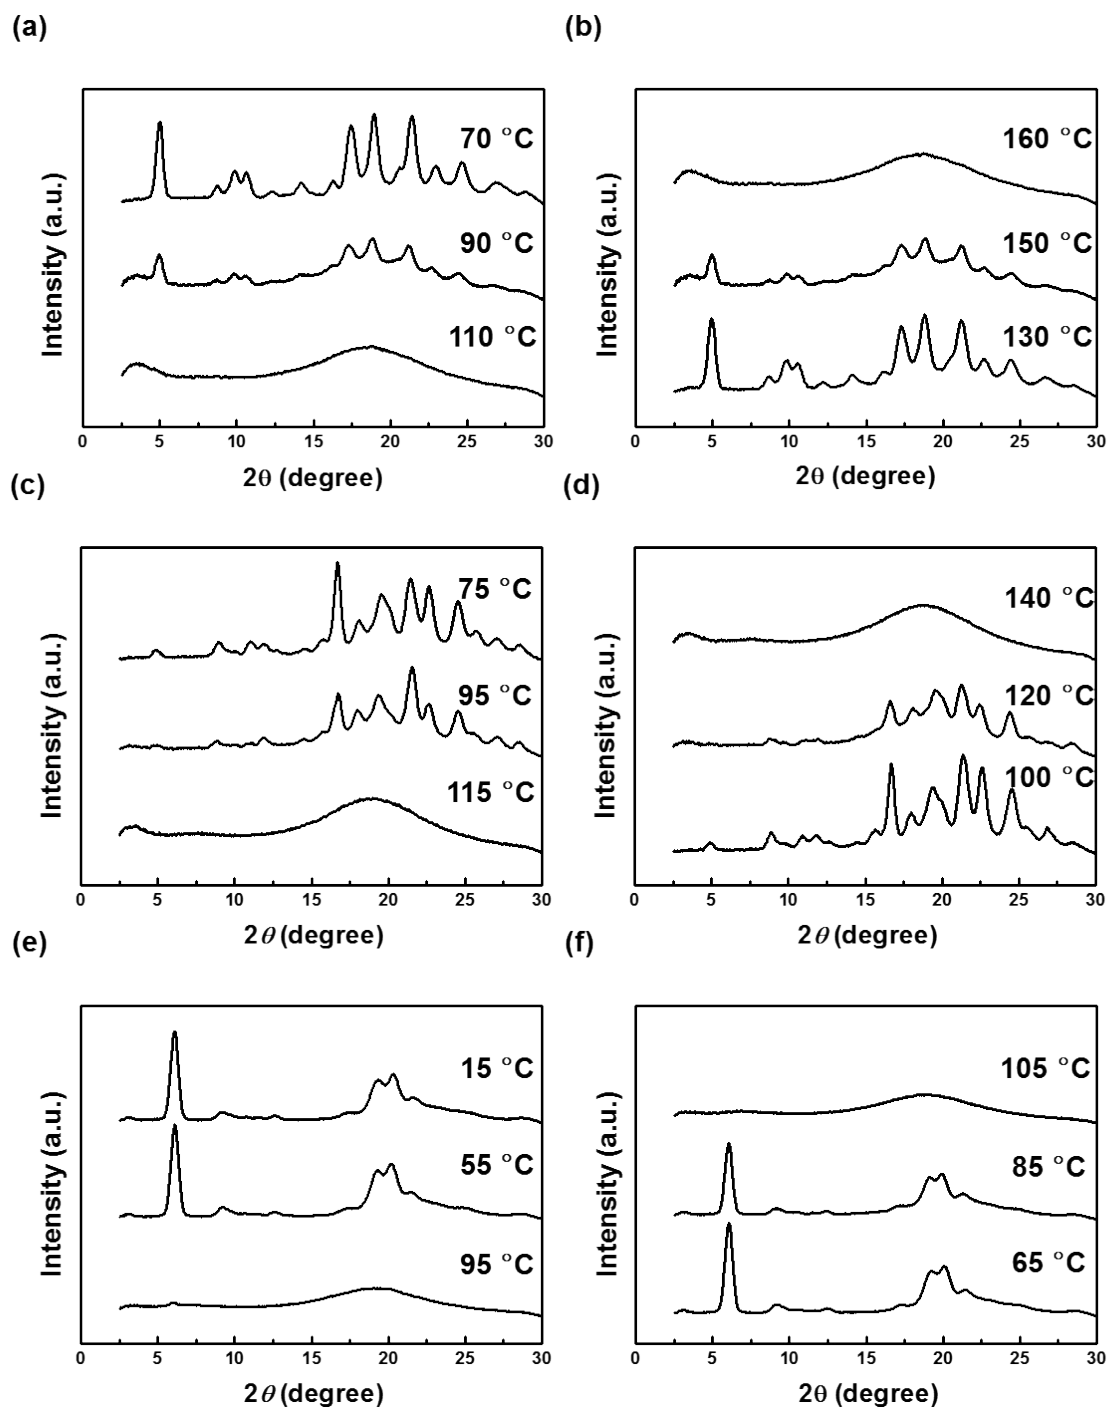

**Figure S12.** XRD patterns of (a, b) DGP304, (c, d) DGP306, and (e, f) DGP308 in the 1st cooling scan (a, c, e) and 2nd heating scan (b, d, f).

(a)

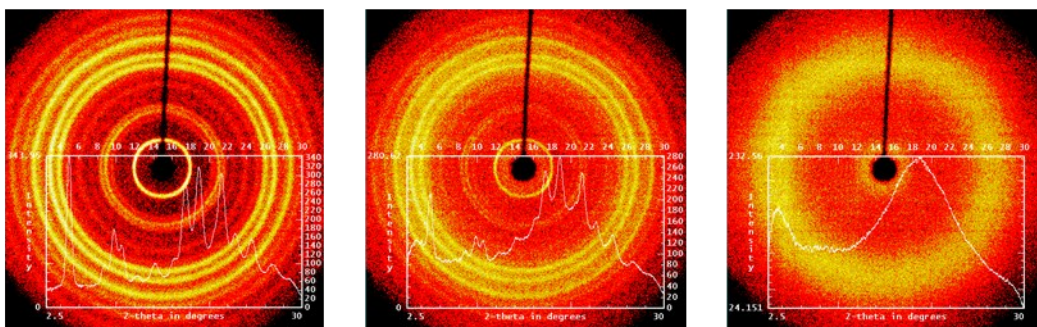

(b)

Crystal (138 °C)

Smectic A (154 °C)

Isotropic (158 °C)

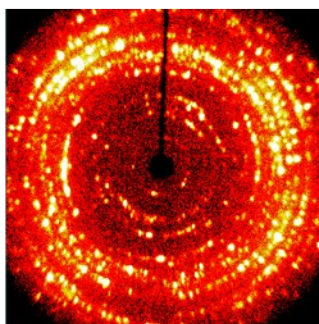

Crystal (100 °C)

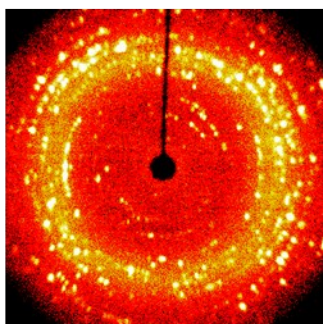

Smectic (120 °C)

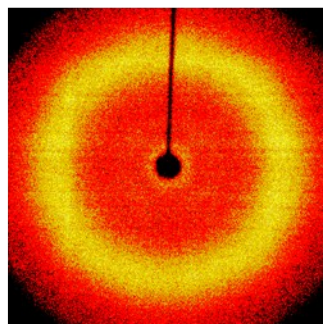

Isotropic (130 °C)

**Figure S13.** 2DXRD patterns of DGP30X epoxy (a) DGP304, (b) DGP306

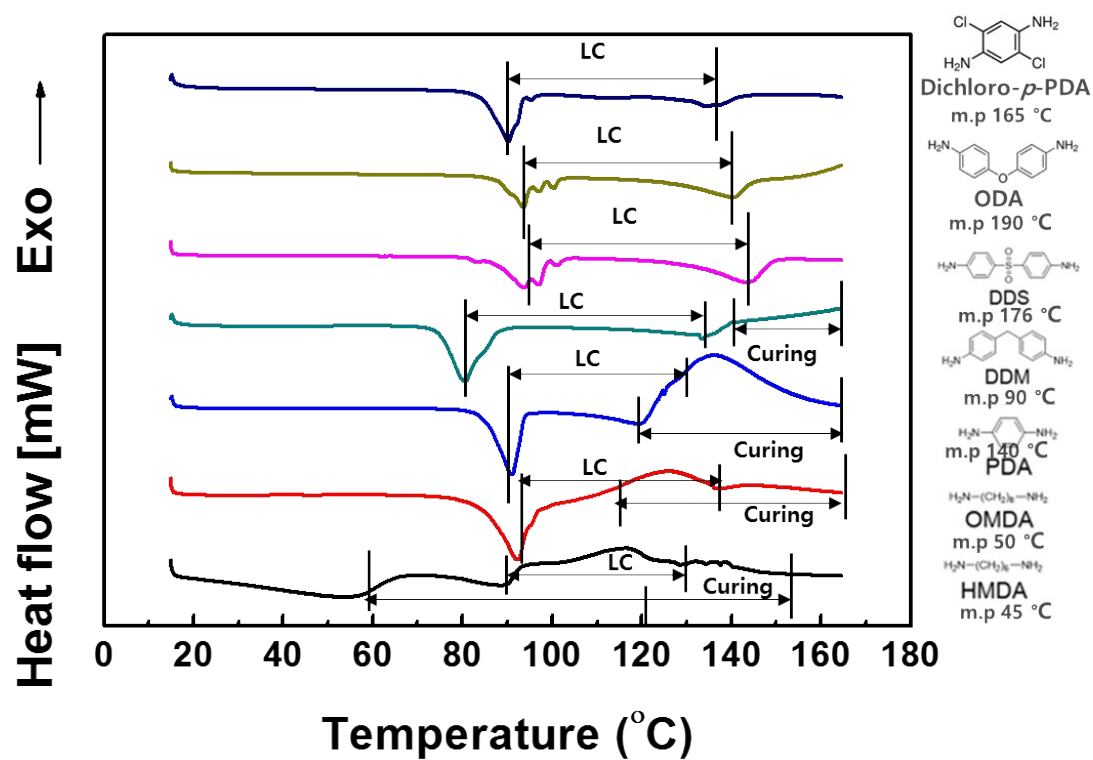

**Figure S14.** DSC thermograms for mixtures of System 2 and curing agents in the 1st heating scan



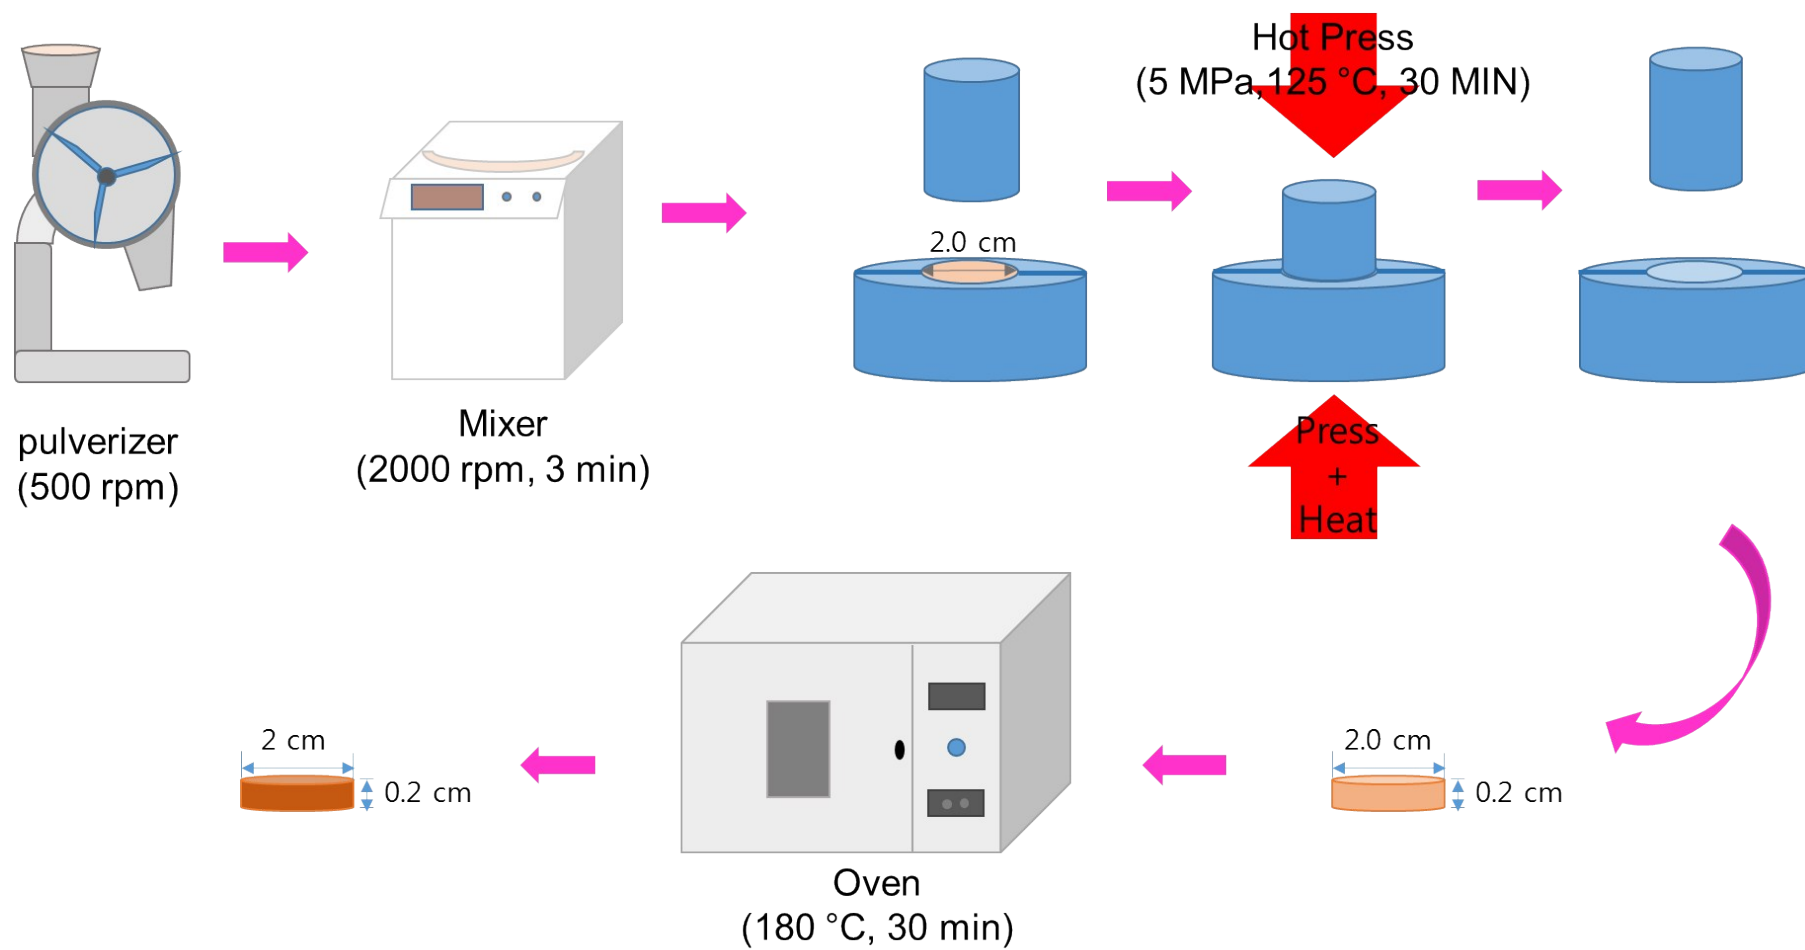

**Figure S15.** Procedure of sample of System 2/PDA by using hot-press
